# Supplementary material
Source: publisher figshare collection journal article supplement (https://tandf.figshare.com/articles/dataset/_/13795126)

## The Spread of Languages of the Limpopo Province across Northern South Africa

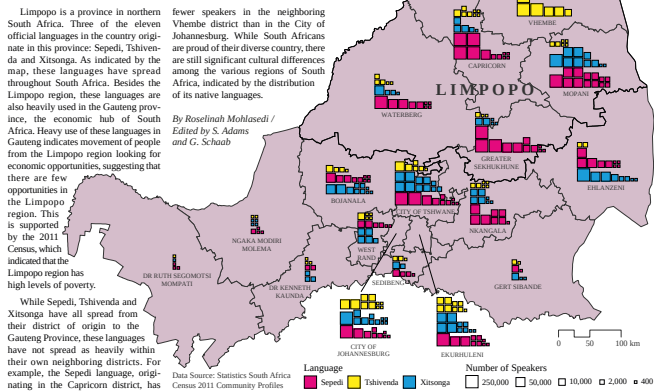

## Main Fuel Used for Cooking in the Northern Provinces of South Africa

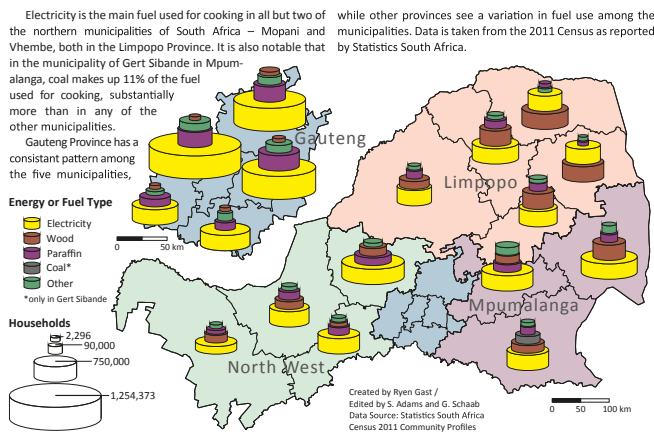

## The Age of the Cell Phone in Northern South Africa

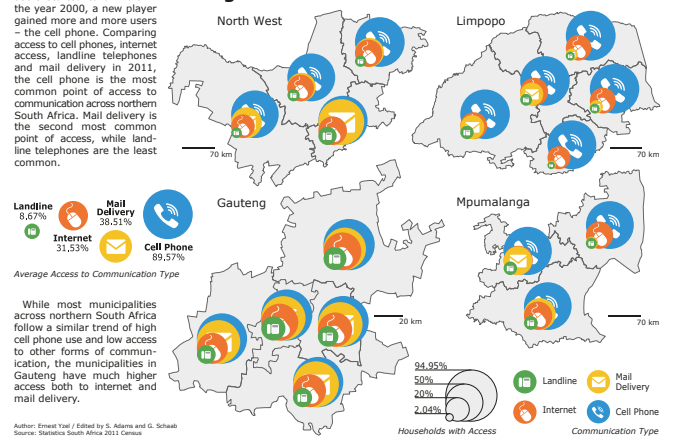

## WATER: A SOURCE OF LIFE

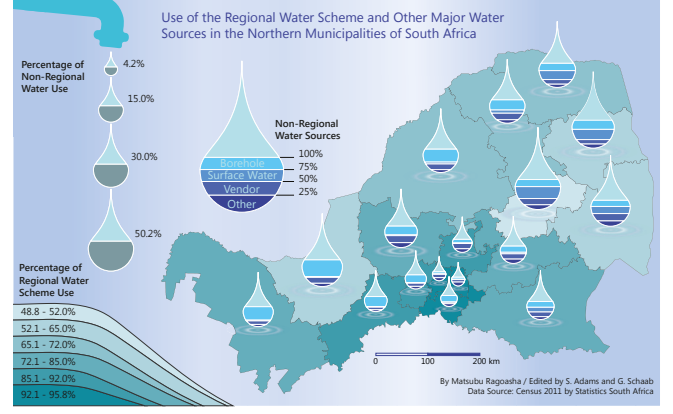

## Climbing the Education Ladder

Highest Educational Level Reported in the Northern Municipalities of South Africa 2011

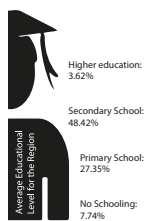

## Population Groups in the Limpopo, North West, Gauteng and Mpumalanga Provinces

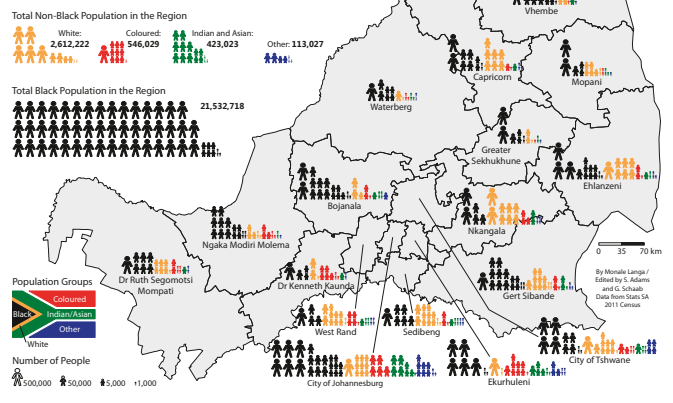

## Refuse Disposal in Northern South Africa

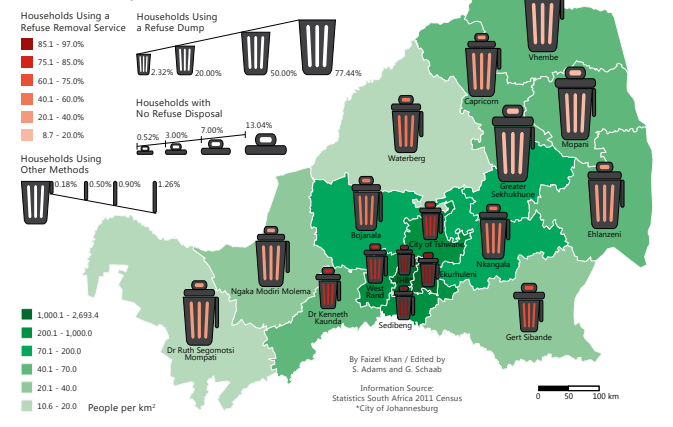

Supplement: Supplementary file 2 [file 1]
